# Supplementary material for: JMJD6 Autoantibodies as a Potential Biomarker for Inflammation-Related Diseases
Source: MDPI journal article supplement (doi:10.3390/ijms25094935), 2024-04-30
Supplement: s1 [file s1]

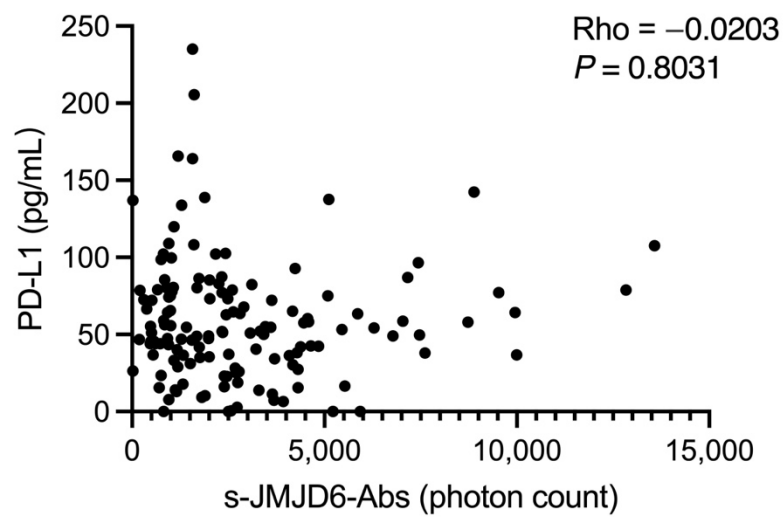

**Supplementary Figure S1.** Spearman correlation analysis between the levels of serum anti-JMJD6 antibodies (s-JMJD6-Abs) and PD-L1 in patients with esophageal cancer.
